# Supplementary material
Source: MDPI journal article supplement (https://www.mdpi.com/2072-4292/12/6/981)
Supplement: s1 [file s1]

# Supplementary Materials: Crop Loss Evaluation Using Digital Surface Models from Unmanned Aerial Vehicles Data

Virginia E. Garcia Millan, Cassidy Rankine and G. Arturo Sanchez-Azofeifa

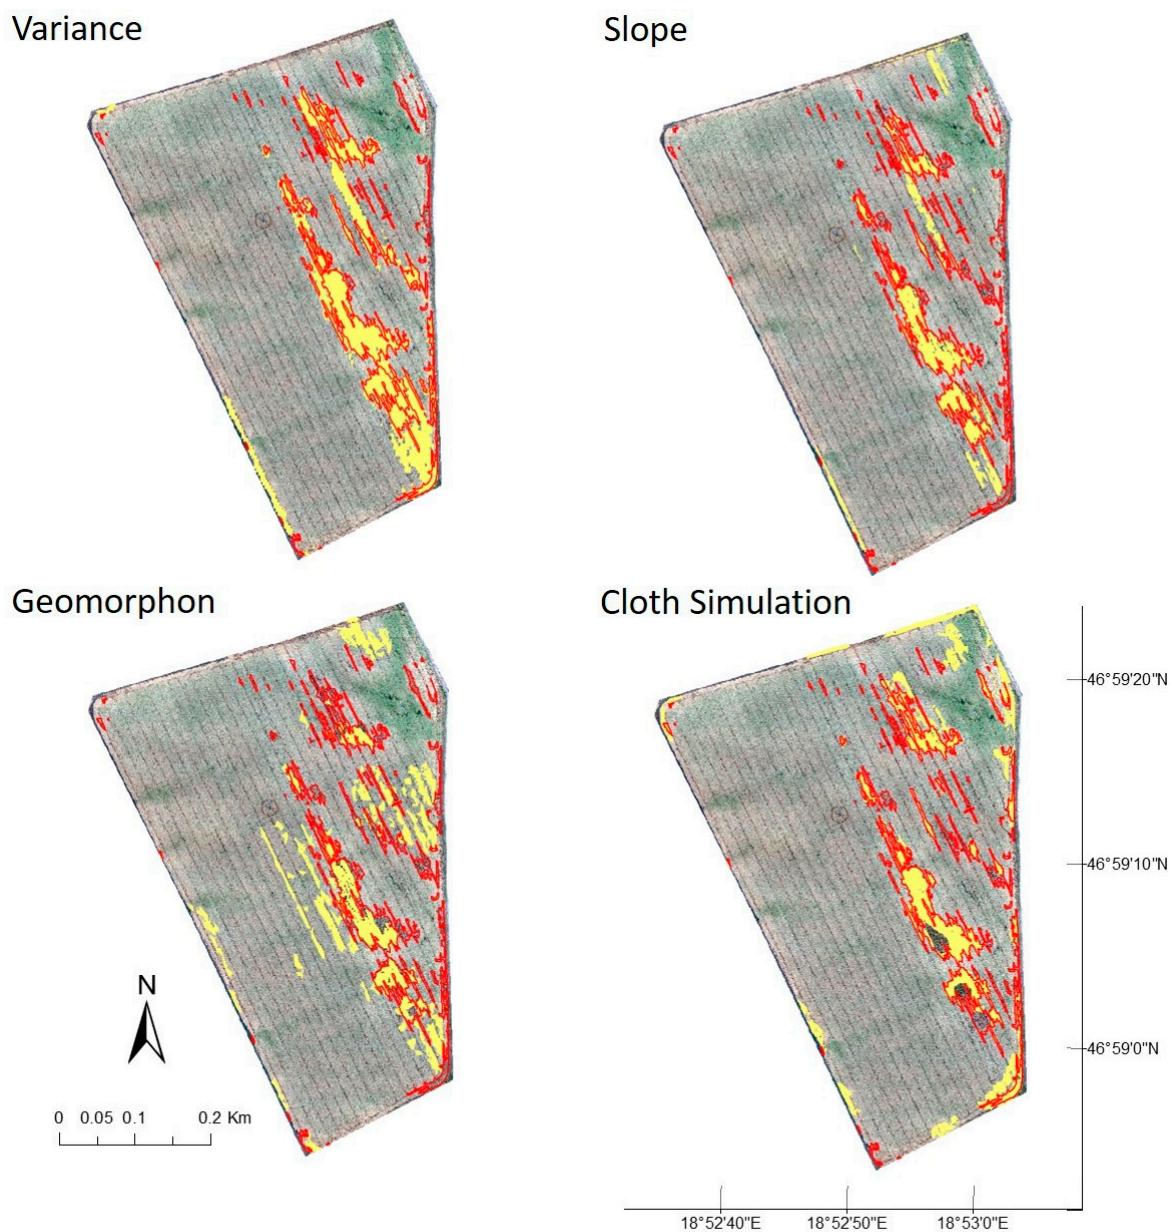

**Figure S1.** Results of the six terrain analysis and post-processing workflow on dataset W1W (shown in yellow). In red, the damages detected from photointerpretation. UTM WGS84 Zone 34N.

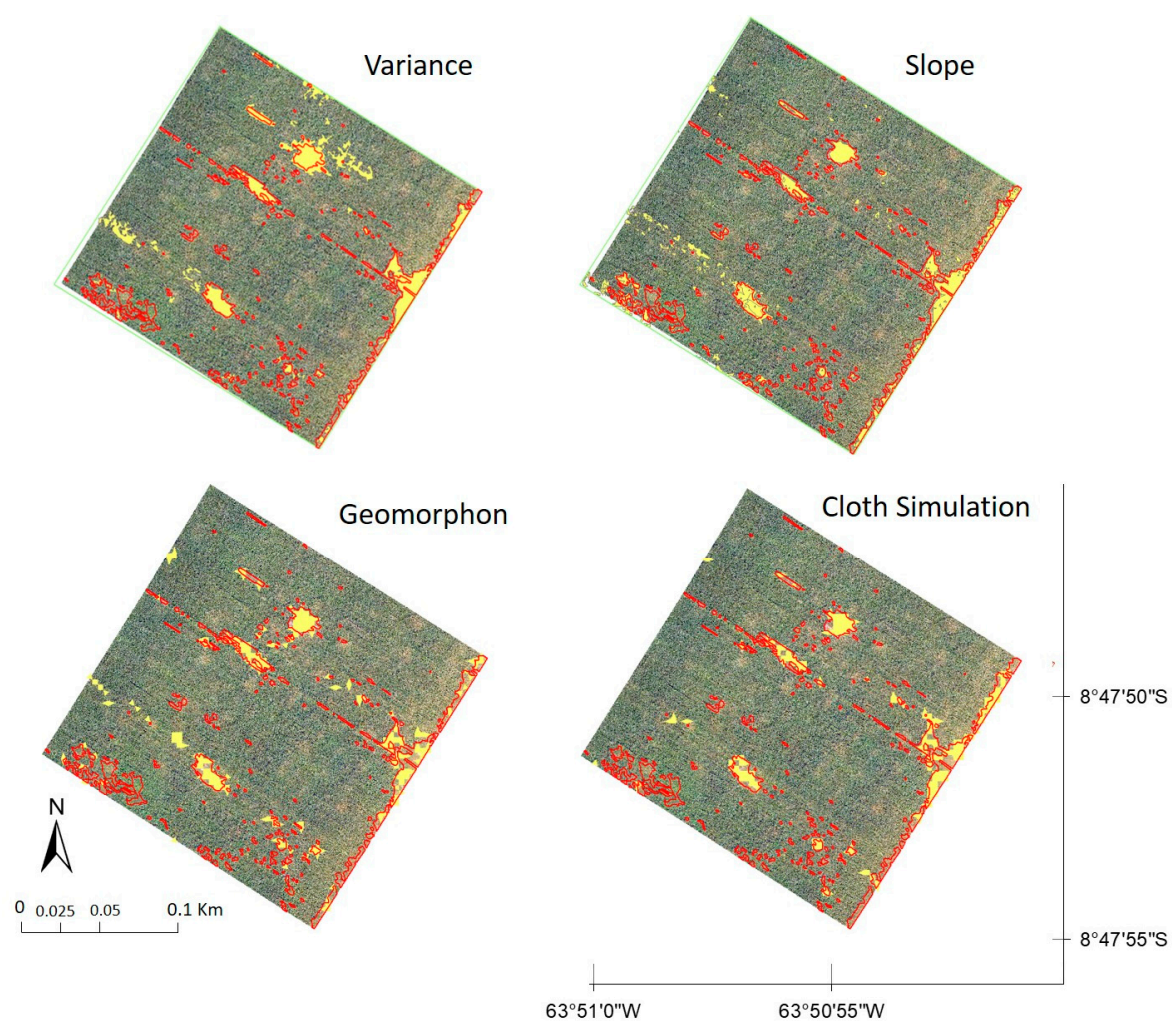

**Figure S2.** Results of the six terrain analysis and post-processing workflow on dataset C1M (shown in yellow). In red, the damages detected from photointerpretation. UTM WGS84 Zone 20S.



Variance

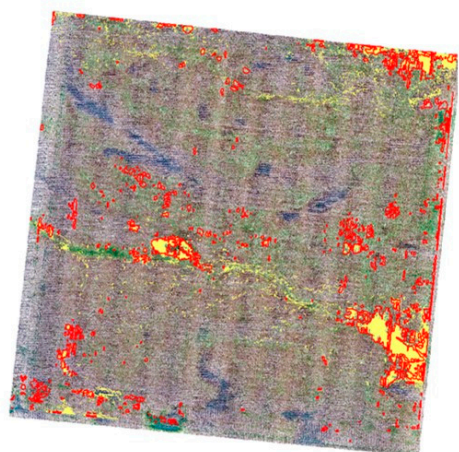

Slope

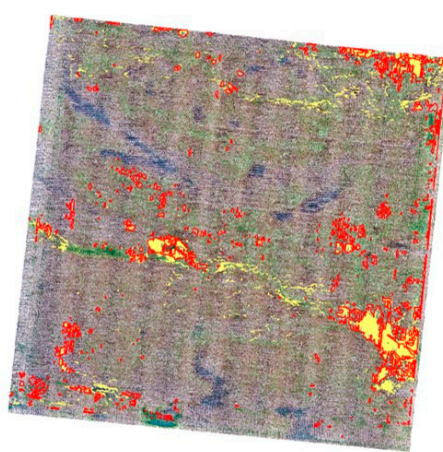

Geomorphon

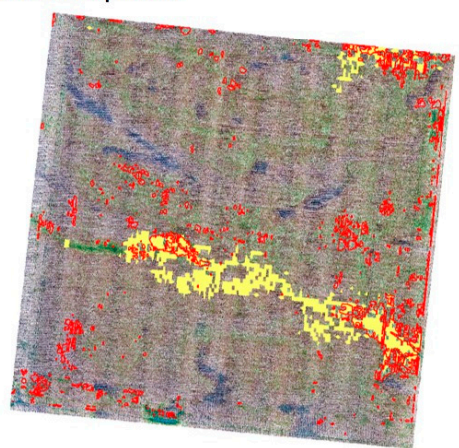

Cloth Simulation

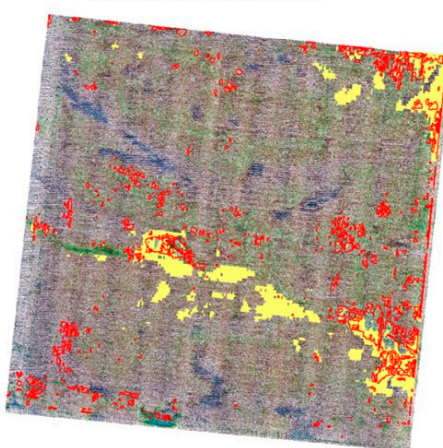

0 0.05 0.1 0.2 0.3 Km

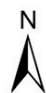

106°33'40"W 106°33'20"W 106°33'0"W

52°40'50"N

52°40'40"N

52°40'30"N

**Figure S3.** Results of the six terrain analysis and post-processing workflow on dataset B1L (shown in yellow). In red, the damages detected from photointerpretation. UTM WGS84 Zone 14N.

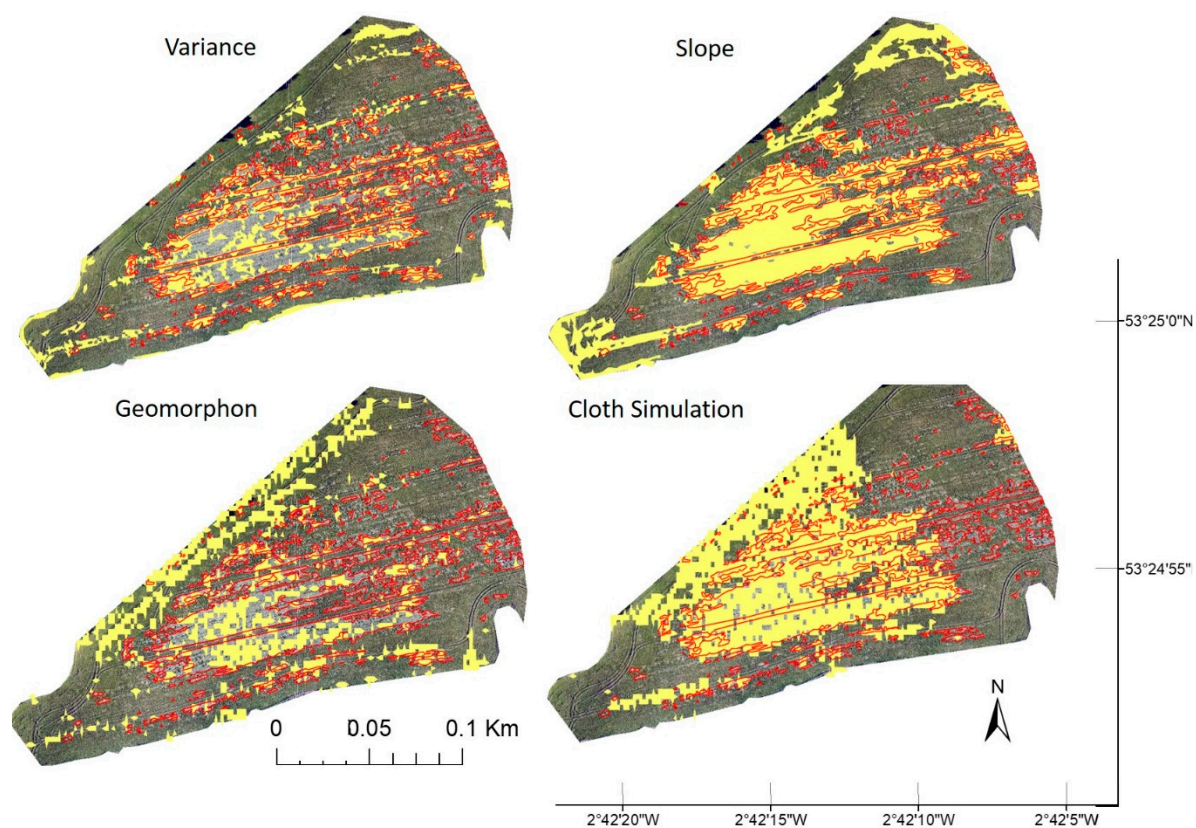

**Figure S4.** Results of the six terrain analysis and post-processing workflow on dataset W2W (shown in yellow). In red, the damages detected from photointerpretation. UTM WGS84 Zone 30N.

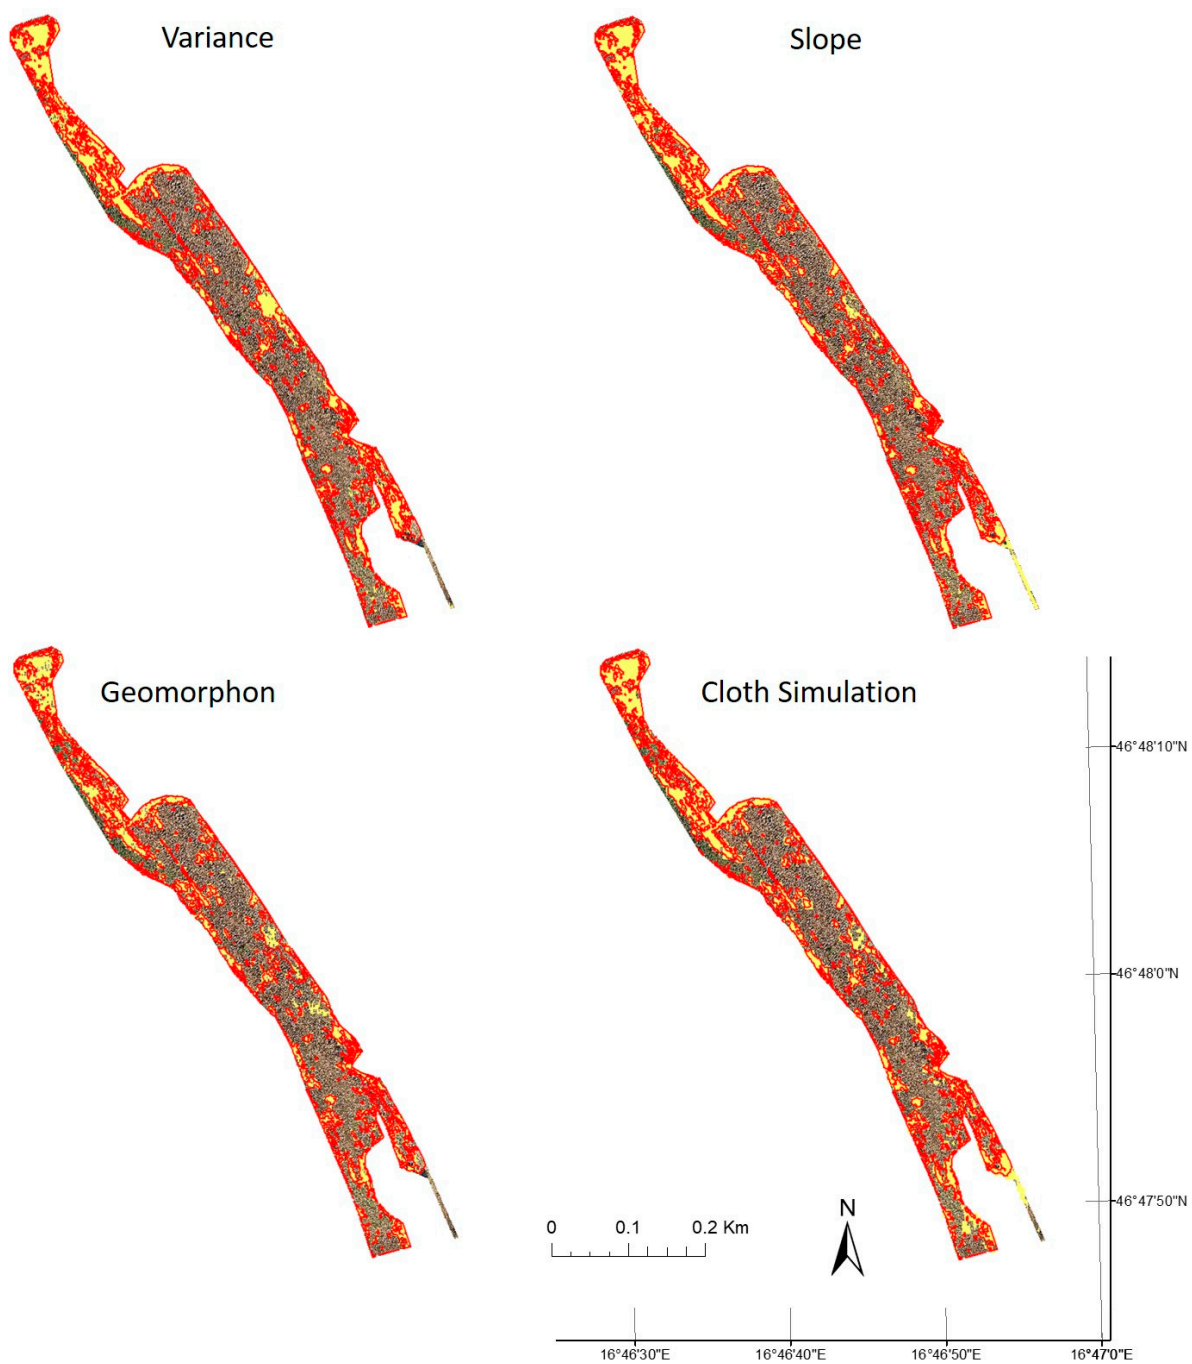

**Figure S5.** Results of the six terrain analysis and post-processing workflow on dataset C2A (shown in yellow). In red, the damages detected from photointerpretation. UTM WGS84 Zone 33N.



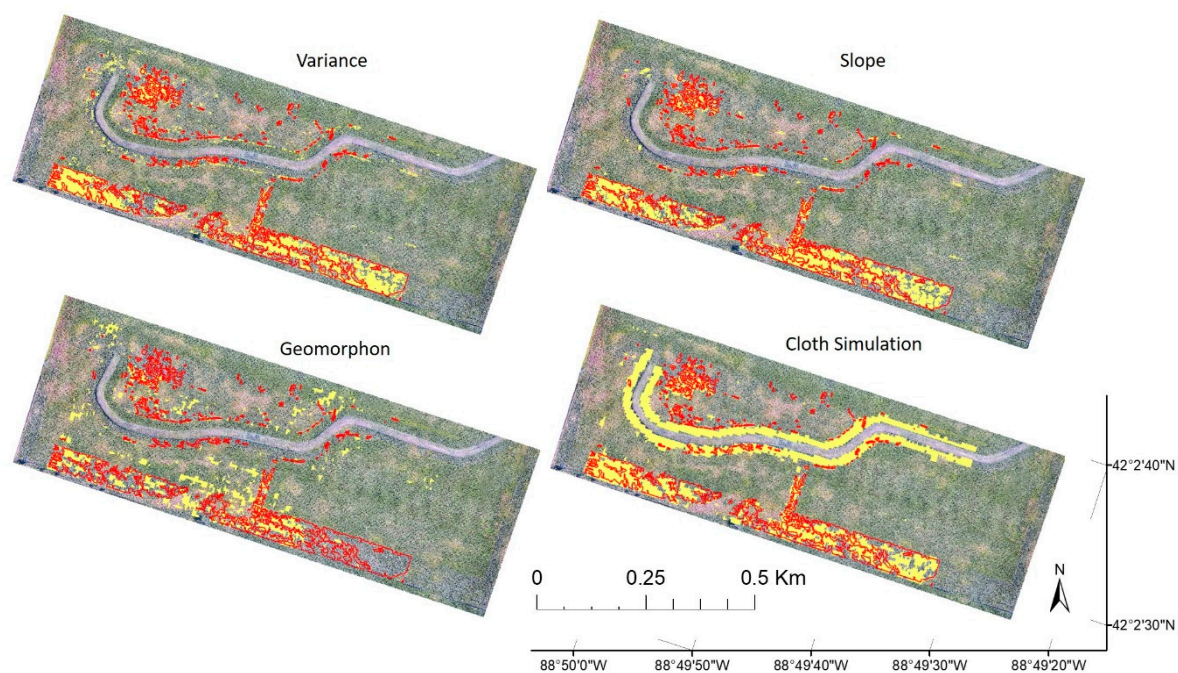

**Figure S6.** Results of the six terrain analysis and post-processing workflow on dataset C3W (shown in yellow). In red, the damages detected from photointerpretation. UTM WGS84 Zone 16N.
